# Supplementary material for: Quantum dots cause acute systemic toxicity in lactating rats and growth restriction of offspring
Source: Royal Society of Chemistry journal article supplement (doi:10.1039/c8nr01248b), 2018-01-01
Supplement: c8nr01248b1.pdf [file c8nr01248b1.pdf]

## Supplementary information

# Quantum dots cause acute systemic toxicity in lactating rats and growth restriction of offspring

Lin Yang<sup>1,2</sup>, Huijuan Kuang<sup>1</sup>, Wanyi Zhang<sup>1,3</sup>, Hua Wei<sup>1</sup> and Hengyi Xu<sup>1\*</sup>

<sup>1</sup>State Key Laboratory of Food Science and Technology, Nanchang University, Nanchang 330047, China.

<sup>2</sup>Comprehensive Pneumology Center (CPC), Institute of Lung Biology and Disease, Helmholtz Zentrum München, Munich, Ingolstaedter Landstrasse 1, 85764 Neuherberg/Munich, Germany.

<sup>3</sup>The Second Affiliated Hospital of Nanchang University, Nanchang 330000, China.

### \* Corresponding Author

#### Dr. Hengyi Xu

State Key Laboratory of Food Science and Technology, Nanchang University.

Address: 235 Nanjing East Road, Nanchang 330047, P.R. China.

Phone: +0086-791-8830-4447-ext-9520.

Fax: +0086-791-8830-4400. E-mail: kidyxu@163.com; HengyiXu@ncu.edu.cn.

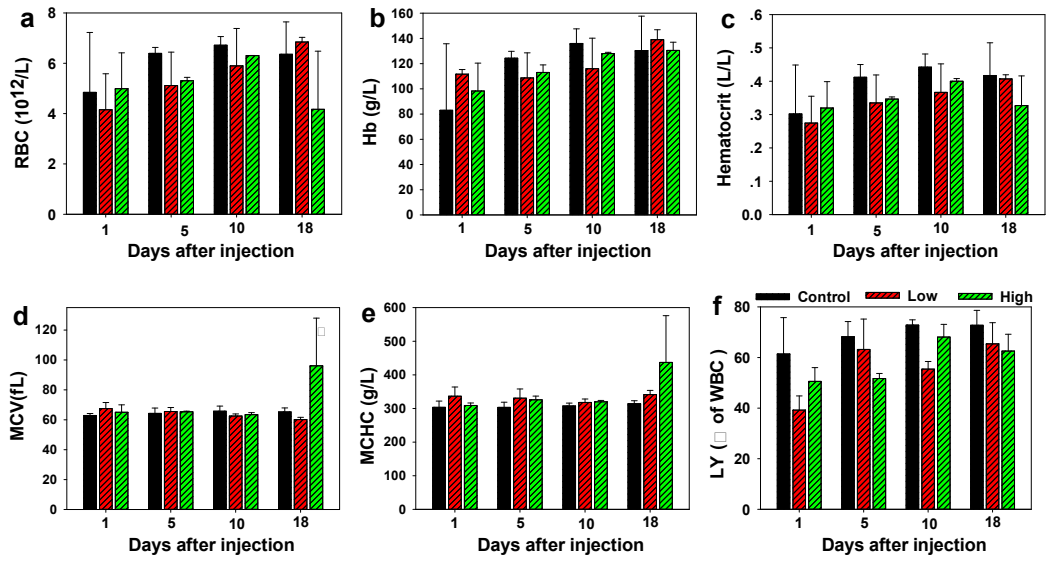

Fig S1 whole blood tests of maternal rats treated with 5 nmol (high) or 1 nmol (low) QDs and vehicle control. a-h) results exhibit mean and standard deviation of red blood cells count, RBC (a); hemoglobin, Hb (b), Hematocrit (c), mean corpuscular volume, MCV (d), mean corpuscular hemoglobin concentration, MCHC (e); lymphocyte, LY (f). n=3.

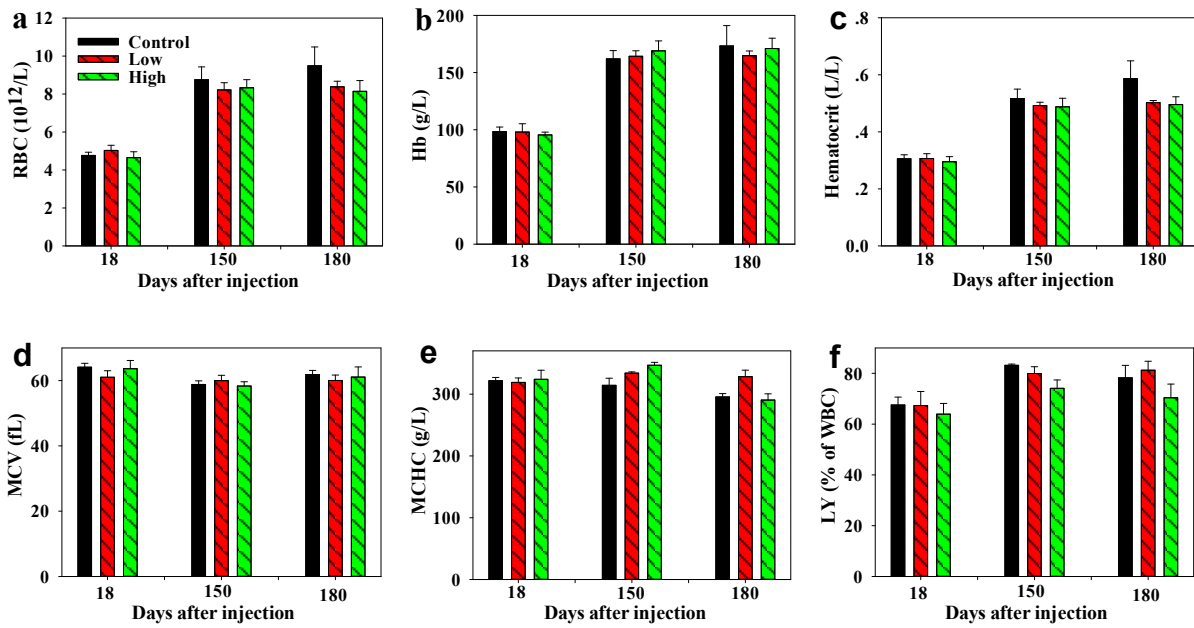

Fig S2 Whole blood tests of offspring in 5 nmol QDs group (high) or 1 nmol QDs group (low) and vehicle control at 18, 60, 120, 150 and 180 dpi. a-f) results exhibit mean and standard deviation of red blood cells count, RBC (a); hemoglobin, Hb (b), Hematocrit (c), mean corpuscular volume, MCV (d), mean corpuscular hemoglobin concentration, MCHC (e); lymphocyte, LY (f). n=3.

Control

D1 (Low)

D1 (High)

D18 (Low)

D18 (High)

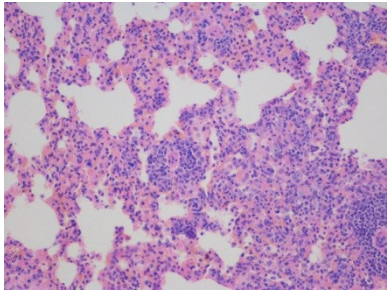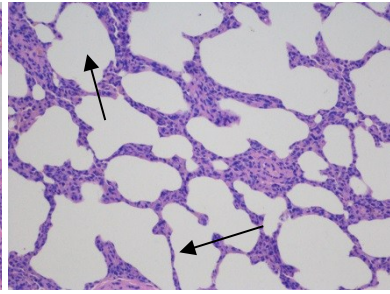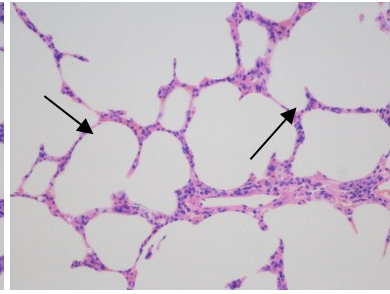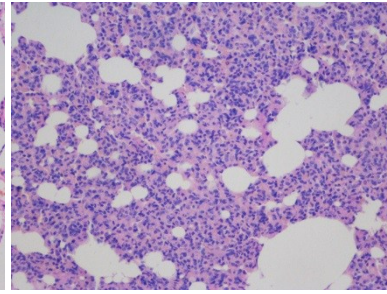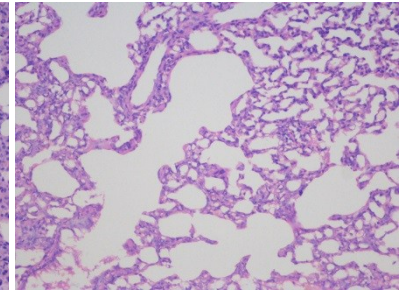

Lung

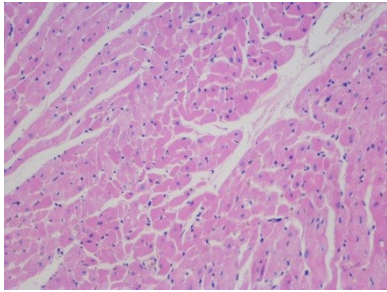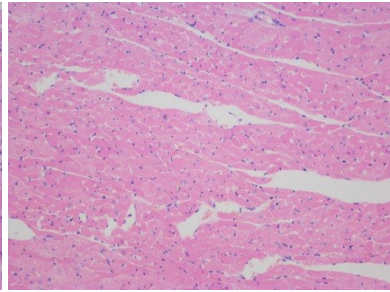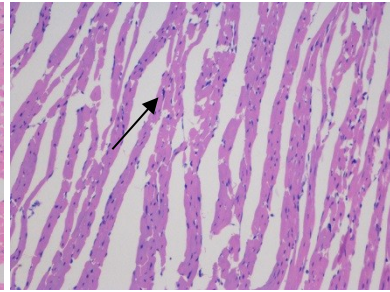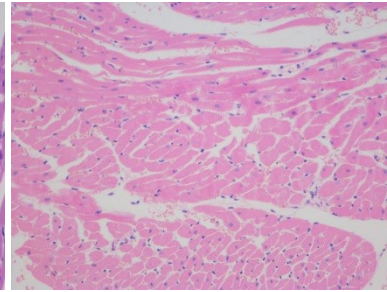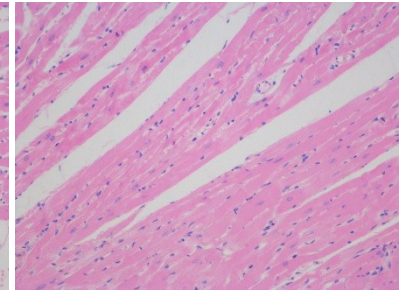

Heart

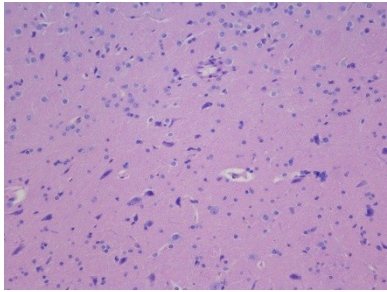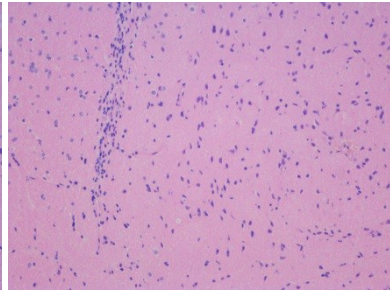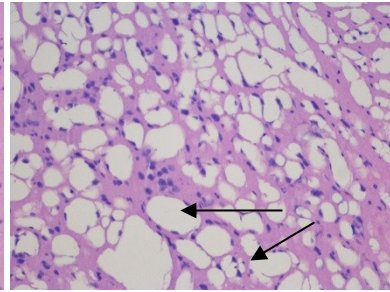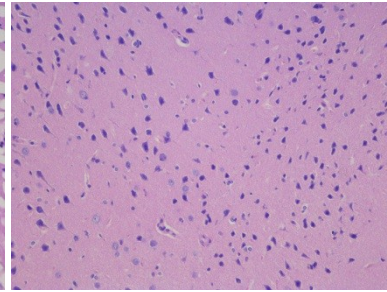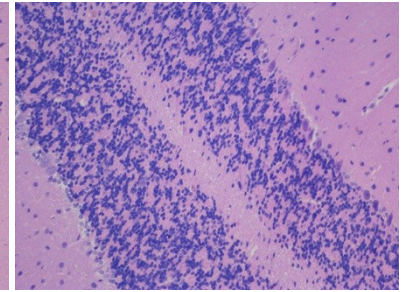

Brain



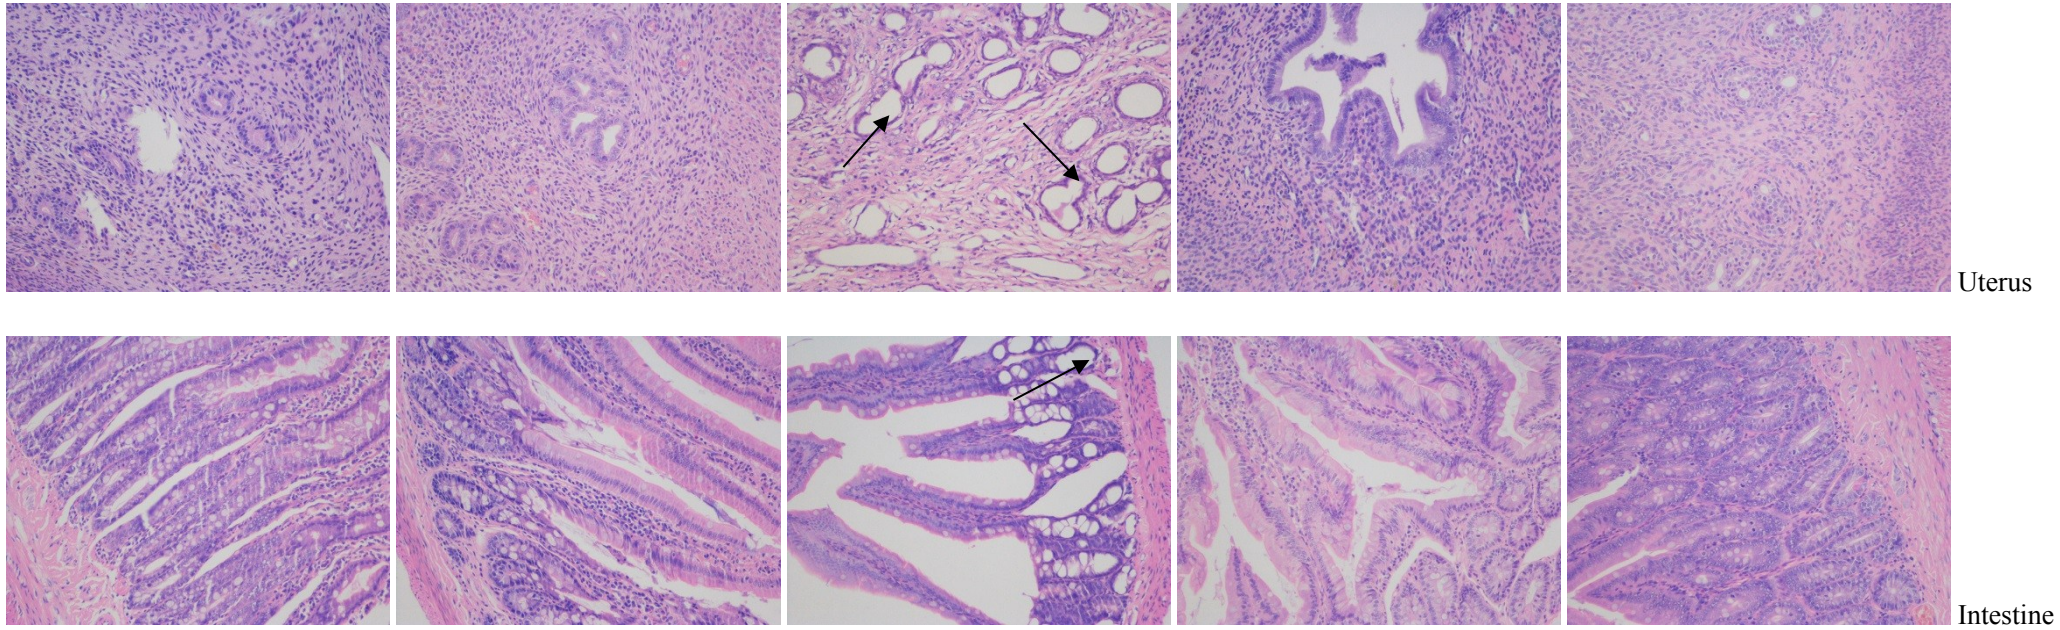

Figure S3 Histological images of maternal rat's lung, heart, brain, uterus, and intestine on 1 (D1) and 18(D18) dpi. Arrows indicate structural damages on both treated rats organs.



Heart

Lung

Brain

Testis

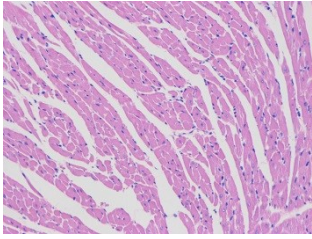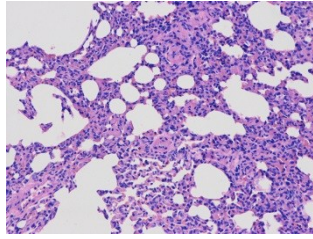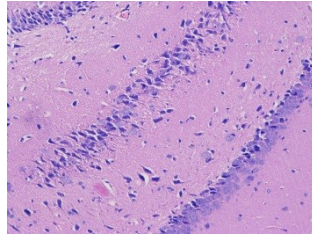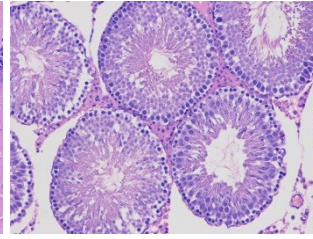

Control 60 d

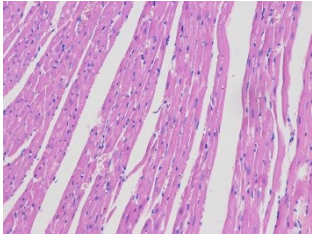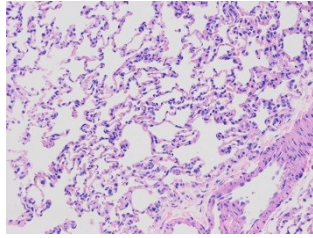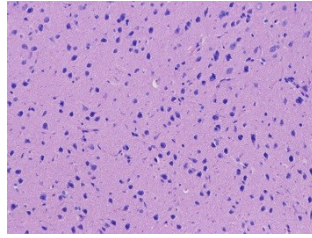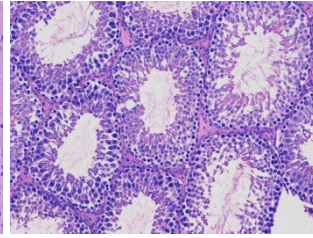

Low 60 d

Heart

Lung

Brain

Uterus

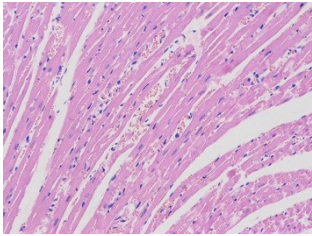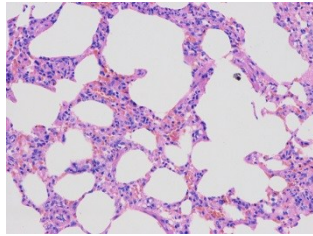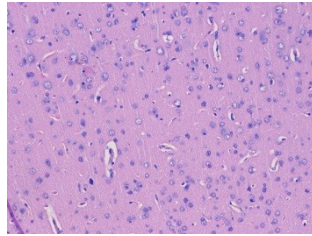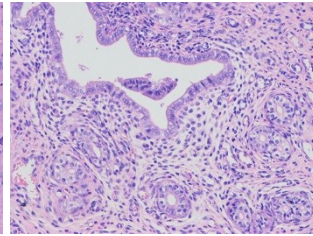

Control 120 d

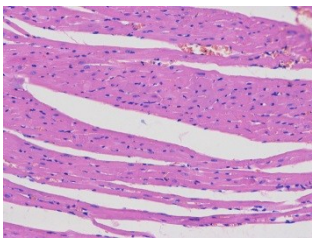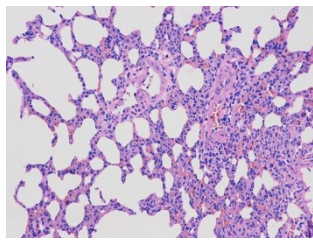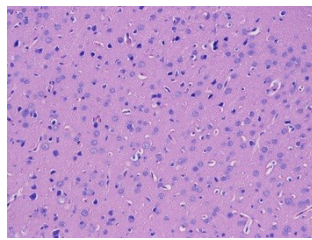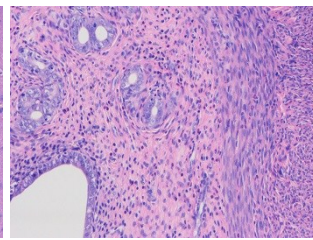

Low 120 d

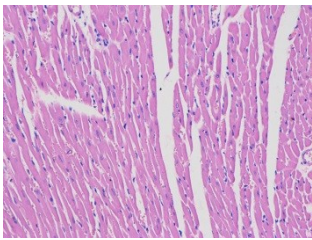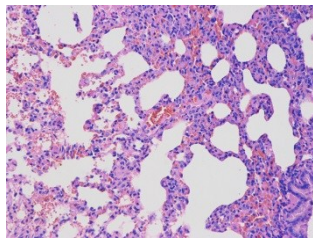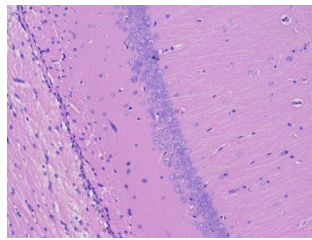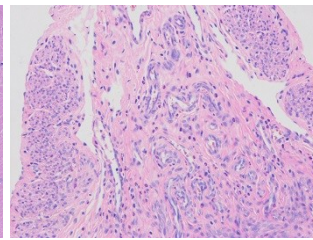

High 120 d

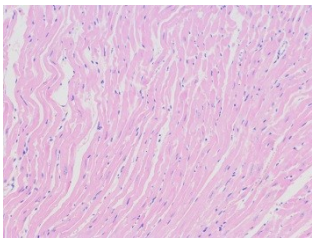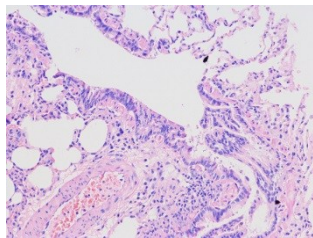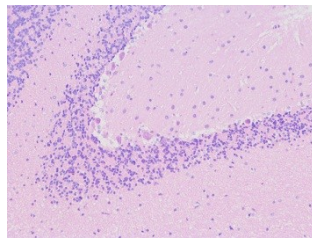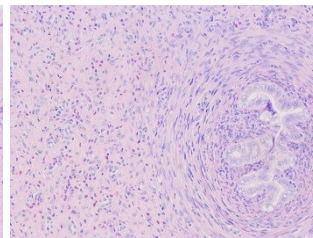

Control 180 d

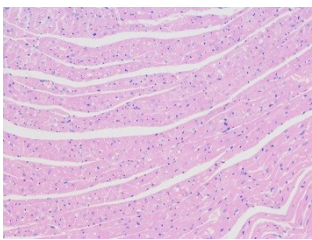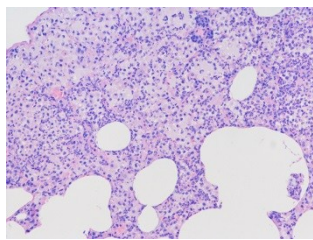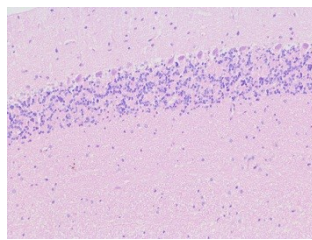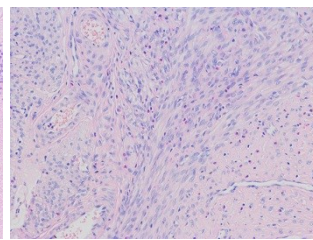

Low 180 d



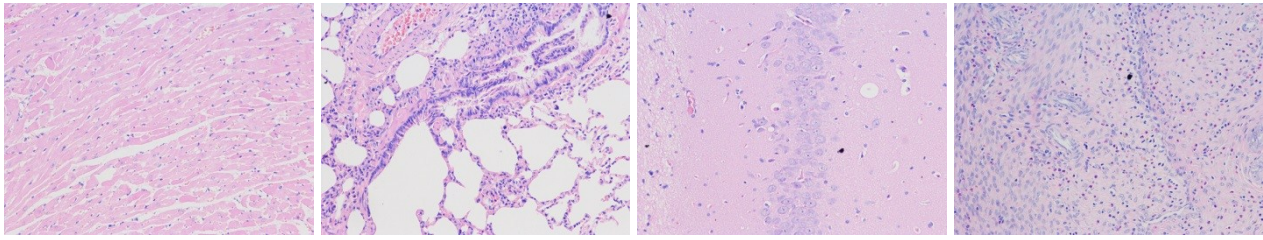

High 180 d

Figure.S4 Histological images of offspring's heart, lung, brain, testis and uterus on 60, 120 d, and 180 d post injection.

Table S1 Summary of the applied doses and delivered doses of QDs in classical QDs toxicological studies in animals over the past decade except one silver study as it is very relevant to our study.

| NPs                         | Sizes (nm)  | models          | Administrated routes and doses                | Examined organ/tissues        | Delivered doses in organ/tissues                                                                   | References (Journal and year)           |
|-----------------------------|-------------|-----------------|-----------------------------------------------|-------------------------------|----------------------------------------------------------------------------------------------------|-----------------------------------------|
| CdSe/ZnS Quantum dots (QDs) | 4.36-8.45   | Rats            | i v. 3 nmol/rat                               | Liver, spleen                 | 4.5-26.5% of injected dose (ID) in liver, 0.5-6.3% ID in spleen.                                   | Nature Biotechnology 2007 [1]           |
| CdSe/ZnS QDs                | 12          | Mice            | 0.48 nmol = 8.5 mg/kg (170 µg Cd)             | Liver and spleen              | Fluorescence examination                                                                           | Nano Letter 2009 [2]                    |
| CdSe/ZnS QDs                | 13-21 nm    | Rats            | i v. 2.5 nmol, 5 nmol and 15 nmol per rat     | Liver and spleen              | 920-1690 ng/g in liver<br>500-2100 ng/g in spleen.                                                 | Small 2010 [3]                          |
| CdTe QDs                    | 1.67-4.20   | Pregnant mice   | i v. Containing 20, 50, 80, and 125 µg Cd QDs | Liver and spleen              | 5849 ng/g in liver,<br>4900 ng/g in spleen                                                         | Small 2010 [4]                          |
| CdSe/CdS/ZnS QDs            | 7-8         | rhesus macaques | i v. 25 mg/kg                                 | Liver and spleen              | 18000 ng/g in liver,<br>63000 ng/g in spleen                                                       | Nature Nanotechnology 2012 [5]          |
| CdTe QDs                    | 2           | Mice            | i v. 0.2 and 2 nmol per mouse                 | Testes                        | 100-750 ng/g in testes                                                                             | Biomaterials 2016 [6]                   |
| Sliver NPs                  | 100, 50, 10 | Lactating mice  | i v. 1.5 mg/kg                                | Breast milk and blood         | 100-300 ng/g in milk,<br>100-400 ng/g in blood.                                                    | ACS Nano 2016 [7]                       |
| CdSe/CdS/ZnS QDs            | 7-8         | Mice            | i v. 25 mg/kg                                 | Not mentioned                 | Not mentioned                                                                                      | Nanotheranostics 2017 [8]               |
| CdSe/ZnS QDs, CdSe QDs      | 15, 20      | Mice            | i v. 0.1 nmol per mouse                       | Uterus, placenta              | 107 ng/g in uterus,<br>352 ng/g in placenta                                                        | Journal of Hazardous Materials 2016 [9] |
| CdSe/ZnS QDs                | 20          | Lactating rats  | i v. 1 nmol and 5 nmol per rat                | Milk, blood, liver and spleen | 50-200 ng/g in milk, 0-600 ng/g in blood,<br>2353-11495 ng/g in liver,<br>931-14566 ng/g in spleen | This study                              |

## References

1. Choi HS, Liu W, Misra P, Tanaka E, Zimmer J P, Ipe B I, Frangioni J V. Renal clearance of quantum dots. *Nat Biotechnol.* 2007. 25(10): 1165-1170.
2. Fitzpatrick JAJ, Andreko SK, Ernst LA, et al. Long-term persistence and spectral blue shifting of quantum dots in vivo. *Nano letters.* 2009. 9(7): 2736-2741.
3. Hauck TS, Anderson RE, Fischer HC, Newbigging S, Chan WC. In vivo quantum-dot toxicity assessment. *Small.* 2010;6(1):138-144
4. Chu M, Wu Q, Yang H, et al. Transfer of quantum dots from pregnant mice to pups across the placental barrier. *Small.* 2010;6(5):670-678.
5. Ling Ye, Ken-Tye Yong, Liwei Liu, et al. A pilot study in non-human primates shows no adverse response to intravenous injection of quantum dots. *Nat Nanotechnol.* 2012;7:453-458.
6. Li X, Yang X, Yuwen L, et al. Evaluation of toxic effects of CdTe quantum dots on the reproductive system in adult male mice. *Biomaterials,* 2016, 96: 24-32.



7. Morishita Y, Yoshioka Y, Takimura Y, et al. Distribution of Silver Nanoparticles to Breast Milk and Their Biological Effects on Breast-Fed Offspring Mice. *ACS Nano*. 2016;10(9):8180-91.
8. Liu J, Yang C, Liu J, et al. Effects of Cd-based Quantum Dot Exposure on the Reproduction and Offspring of Kunming Mice over Multiple Generations. *Nanotheranostics*, 2017; 1(1): 23-37.
9. Zhang W, Yang L, Kuang H, et al. Acute toxicity of quantum dots on late pregnancy mice: Effects of nanoscale size and surface coating. *J Hazard Mater*. 2016; 318:61-69.

**Table S2.** The visceral index of organs of dams following intravenous injection of high and low doses QDs. D1 and D18 refer to collection of dam organ on post-injection in day 1 and day 18. These results show mean and standard deviation, n=3 or 6. \*P < 0.05 and \*\*P < 0.01 versus the control group.

|            | <b>BW (g)</b> | <b>Liver (mg/g)</b> | <b>Spleen (mg/g)</b> | <b>Kidney (mg/g)</b> | <b>Lung (mg/g)</b> | <b>Heart (mg/g)</b> | <b>Brain (mg/g)</b> |
|------------|---------------|---------------------|----------------------|----------------------|--------------------|---------------------|---------------------|
| Low (D1)   | 345.77±7.45   | 39.99±4.56          | 2.36±0.15            | 5.66±1.81            | 5.73±0.05          | 5.40±0.99           | 5.54±0.17           |
| High (D1)  | 326.71±21.96  | 51.28±0.61          | 5.20±2.03**          | 7.74±0.42            | 7.16±2.20          | 4.23±0.61           | 5.93±0.46           |
| Low (D18)  | 362.60±18.80  | 51.80±6.36          | 2.17±0.23            | 6.88±0.50            | 5.42±0.28          | 4.77±0.75           | 4.57±0.72           |
| High (D18) | 360.23±10.17  | 49.20±1.82          | 5.12±1.36**          | 6.00±1.59            | 4.91±0.91          | 4.44±0.20           | 5.41±0.31           |
| Control    | 362.17±22.53  | 49.37±6.91          | 1.96±0.18            | 6.48±1.56            | 5.07±0.14          | 4.76±0.80           | 4.75±0.77           |

**Table S3.** Serum biochemical indicators of maternal rats treated with 5 nmol (high) or 1 nmol (low) QDs and vehicle control. Abbreviations: alanine aminotransferase, ALT; aspartate aminotransferase, AST; total bilirubin, TBIL; direct bilirubin, DBIL; total protein, TP; albumin, ALB; globulin, GLB; the ratio of albumin to globulin, A/G; gamma glutamyl transaminase, GGT; alkaline phosphatase, ALP; creatinine, CRE; blood urea nitrogen, BUN; and urea, UA, n = 3. \*P < 0.05 and \*\*P < 0.01 versus the control group.

| Parameters    | D1           |              |                | D5          |             |               | D10        |              |              | D18         |              |              |
|---------------|--------------|--------------|----------------|-------------|-------------|---------------|------------|--------------|--------------|-------------|--------------|--------------|
|               | Control      | Low          | High           | Control     | Low         | High          | Control    | Low          | High         | Control     | Low          | High         |
| ALT (U/L)     | 62±11.22     | 62.66±17.30  | 1613.5±180.5** | 74.66±10.35 | 66.5±14.28  | 176.5±14.28** | 87.5±0.41  | 103.5±19.18  | 75.5±11.84   | 89±8.98     | 112.33±12.07 | 84.5±11.02   |
| AST (U/L)     | 201.67±49.40 | 408±3*       | 11435±875**    | 224±23.36   | 214.5±11.02 | 832±67.77**   | 194.5±11.0 | 312.67±16.12 | 214.5±52.66  | 197±8.98    | 166±22.72    | 312.5±120.43 |
| TBIL (µmol/L) | 0.46±0.04    | 0.56±0.32    | 103.1±67.9**   | 0.43±0.04   | 0.4±0.08    | 5.2±1.38**    | 0.4        | 0.5±0.12     | 0.5±0.08     | 0.35±0.04   | 0.5±0.14     | 0.35±0.04    |
| DBIL (µmol/L) | 0.1          | 0.1          | 15.85±6.85**   | 0.1         | 0.2±0.08    | 2±0.41**      | 0.1        | 0.1          | 0.15±0.04    | 0.1         | 0.13±0.04    | 0.1          |
| TP (g/L)      | 75.8±5.50    | 58.5±12.19*  | 54.15±8.35**   | 77.23±3.24  | 69.15±0.04  | 52.87±4.73**  | 72.6±0.33  | 77.73±5.19   | 78.5±0.65    | 75.3±3.51   | 63.87±1.33   | 74.25±1.10   |
| ALB (g/L)     | 25.4±5.15    | 18.3±3.89*   | 19.3±1.9       | 26.03±4.48  | 22.1±0.08   | 18.1±1.07*    | 26±0.73    | 26.4±2.40    | 23.1±0.16    | 23.75±1.68  | 23.86±0.52   | 19.45±3.63   |
| GLB (g/L)     | 50.4±5.55    | 40.2±8.43    | 34.85±6.45*    | 51.2±4.01   | 47.05±0.12  | 34.76±3.84*   | 46.6±0.41  | 51.33±2.99   | 55.4±0.81    | 51.55±5.18  | 40±1.02      | 54.8±4.74    |
| A/G           | 0.52±0.13    | 0.45±0.03    | 0.56±0.05      | 0.52±0.11   | 0.47±0.09   | 0.52±0.04     | 0.56±0.02  | 0.51±0.02    | 0.42±0.01*   | 0.47±0.08   | 0.59±0.02*   | 0.37±0.09    |
| GGT (U/L)     | 1.33±0.47    | 1            | 7±1**          | 1           | 2           | 6.66±2.94**   | 1          | 1.67±0.41    | 1.5±0.41     | 1           | 1.33±0.41    | 1            |
| ALP (U/L)     | 302.33±86.73 | 170.7±51.18* | 478.5±20.5*    | 375±82.93   | 332.5±15.93 | 514.67±52.39* | 409±40.82  | 423.5±28.17  | 469.5±181.67 | 616.5±61.23 | 422.5±117.1  | 454±209.02   |
| CREA (µmol/L) | 44.63±8.74   | 35.33±12.41  | 51.8±1.6       | 38.96±1.69  | 27.95±2.5** | 37.46±3.31    | 30.35±7.63 | 33.4±5.49    | 30.5±3.76    | 36.1±2.12   | 36.2±5.3     | 29.25±5.59   |
| BUN (mmol/L)  | 8.16±0.98    | 5.63±1.54*   | 8.85±2.25      | 8.9±0.37    | 6.7±0.89    | 11.86±4.43    | 9.45±0.29  | 10.37±1.13   | 8.7±0.48     | 8.5±0.57    | 9.03±0.93    | 9.1±1.39     |
| UA (µmol/L)   | 214±50.64    | 221.33±73.28 | 150±29         | 186.6±54.42 | 270.5±24.9* | 158±40.72     | 219±69.40  | 203.33±24.96 | 211.5±7.76   | 163±18.78   | 249±44.45*   | 199±8.16     |

**Table S4** Cadmium concentrations in dams consecutive blood and feces samples from day 1 (D1) to day 18 (D18) after injection. ( $\mu\text{g/g}$ )

|              | <b>Control</b>     | <b>Low (D1)</b>    | <b>High (D1)</b>  | <b>Low (D5)</b>    | <b>High (D5)</b>  | <b>Low (D10)</b>   | <b>High (D10)</b> | <b>Low (D18)</b>   | <b>High (D18)</b> |
|--------------|--------------------|--------------------|-------------------|--------------------|-------------------|--------------------|-------------------|--------------------|-------------------|
| <b>Blood</b> | -0.024 $\pm$ 0.004 | -0.044 $\pm$ 0.040 | 0.017 $\pm$ 0.008 | -0.035 $\pm$ 0.023 | 0.028 $\pm$ 0.006 | -0.070 $\pm$ 0.019 | 0.057 $\pm$ 0.017 | -0.034 $\pm$ 0.027 | 0.064 $\pm$ 0.019 |
| <b>feces</b> | 0.071 $\pm$ 0.011  | 0.140 $\pm$ 0.027  | 2.057 $\pm$ 0.964 | 0.111 $\pm$ 0.009  | 0.082 $\pm$ 0.026 | 0.037 $\pm$ 0.031  | 0.015 $\pm$ 0.009 | 0.07 $\pm$ 0.013   | 0.016 $\pm$ 0.136 |

**Table S5** Cadmium concentrations in maternal tissues at day 1 (D1) and day 18 (D18) after injection.

| <b>QDs</b>        | <b>Heart (<math>\mu\text{g/g}</math>)</b> | <b>Liver (<math>\mu\text{g/g}</math>)</b> | <b>Spleen (<math>\mu\text{g/g}</math>)</b> | <b>Lung (<math>\mu\text{g/g}</math>)</b> | <b>Kidney (<math>\mu\text{g/g}</math>)</b> | <b>Brain (<math>\mu\text{g/g}</math>)</b> | <b>Stomach (<math>\mu\text{g/g}</math>)</b> | <b>Intestine (<math>\mu\text{g/g}</math>)</b> | <b>Breast(<math>\mu\text{g/g}</math>)</b> | <b>Uterus (<math>\mu\text{g/g}</math>)</b> |
|-------------------|-------------------------------------------|-------------------------------------------|--------------------------------------------|------------------------------------------|--------------------------------------------|-------------------------------------------|---------------------------------------------|-----------------------------------------------|-------------------------------------------|--------------------------------------------|
| <b>Low (D1)</b>   | 0.045 $\pm$ 0.028                         | 2.353 $\pm$ 1.737                         | 0.931 $\pm$ 0.583                          | 0.545 $\pm$ 0.417                        | 0.707 $\pm$ 0.311                          | 0.020 $\pm$ 0.015                         | 0.082 $\pm$ 0.075                           | 0.191 $\pm$ 0.087                             | 0.053 $\pm$ 0.018                         | 0.087 $\pm$ 0.079                          |
| <b>High (D1)</b>  | 0.398 $\pm$ 0.114                         | 11.495 $\pm$ 6.885                        | 14.566 $\pm$ 5.988                         | 11.614 $\pm$ 5.503                       | 5.406 $\pm$ 3.640                          | 0.048 $\pm$ 0.007                         | 0.251 $\pm$ 0.097                           | 0.969 $\pm$ 0.554                             | 0.474 $\pm$ 0.042                         | 0.600 $\pm$ 0.359                          |
| <b>Low (D18)</b>  | 0.165 $\pm$ 0.019                         | 4.493 $\pm$ 0.599                         | 11.825 $\pm$ 1.401                         | 0.966 $\pm$ 0.344                        | 12.509 $\pm$ 0.437                         | 0.019 $\pm$ 0.006                         | 0.109 $\pm$ 0.010                           | 0.447 $\pm$ 0.056                             | 0.163 $\pm$ 0.043                         | 0.532 $\pm$ 0.042                          |
| <b>High (D18)</b> | 0.423 $\pm$ 0.047                         | 10.374 $\pm$ 1.364                        | 14.224 $\pm$ 1.885                         | 2.505 $\pm$ 0.383                        | 42.313 $\pm$ 1.684                         | 0.044 $\pm$ 0.005                         | 0.287 $\pm$ 0.050                           | 0.780 $\pm$ 0.117                             | 0.332 $\pm$ 0.106                         | 1.118 $\pm$ 0.058                          |
| <b>Control</b>    | -0.024 $\pm$ 0.001                        | -0.009 $\pm$ 0.001                        | -0.074 $\pm$ 0.008                         | -0.017 $\pm$ 0.002                       | 0.047 $\pm$ 0.015                          | -0.023 $\pm$ 0.001                        | -0.008 $\pm$ 0.007                          | 0.174 $\pm$ 0.009                             | -0.043 $\pm$ 0.001                        | -0.029 $\pm$ 0.006                         |



**Table S6** Cadmium concentrations in breast milk samples at day 2 (D2), day 9 (D9) and day 18 (D18) after injection. n=3.

| Milk (ng/g) | D2           | D9         | D16         |
|-------------|--------------|------------|-------------|
| Control     | 5.64±0.55    | 8.99±2.52  | 19.55±5.55  |
| Low         | 29.55±17.72* | 11.82±1.02 | 39.28±8.03* |

D2: P=0.023, D9: P=0.215, D16: P=0.015

**Table S7** Cadmium concentrations in offspring tissues from day 1 (D1) and day 180 (D180) following the maternal exposure to high and low dose QDs. n=4. \*P < 0.05 and \*\*P < 0.01 versus the control group. ND refers to not detected.

| QDs            | Breast(ng/g)  | Stomach (ng/g) | Intestine (ng/g) | Liver (ng/g) | Kidney (ng/g) | Spleen (ng/g) |
|----------------|---------------|----------------|------------------|--------------|---------------|---------------|
| Low (D1)       | 52.79±18.47   | 6.15±1.94      | 6.53±1.18        | 2.46±0.23    | 5.12±2.2      | 4.01±2.1      |
| High (D1)      | 473.78±42.08  | 8.64±2.67      | 7.78±2.61        | 6.83 ± 2.99  | 6.33±0.54     | 3.28±0.12     |
| Control (D1)   | < 0           | 6.05±3.02      | 6.93±3.90        | 3.76±0.36    | 4.86±0.45     | 4.10±0.70     |
| Low (D5)       | ND            | 7.38±1.84      | 94.74±0.57*      | 2.82±0.50    | 3.62±1.04     | 1.72±0.5      |
| High (D5)      | ND            | 22.72±13.94*   | 130.25±23.17**   | 8.36±2.00    | 7.87±0.88     | 2.26±0.78     |
| Control (D5)   | ND            | 9.25±0.36      | 60.15±13.56      | 6.34±1.20    | 5.78±0.72     | 1.98±0.28     |
| Low (D10)      | ND            | 13.19±3.65     | 168.23±56.23*    | 4.28±0.71    | 4.48±1.00     | 6.52±1.3      |
| High (D10)     | ND            | 19.99±6.56*    | 198.27±43.76**   | 4.22±1.43    | 8.65±0.11     | 4.82±0.25     |
| Control (D10)  | ND            | 10.23±1.89     | 103.24±33.25     | 3.68±0.35    | 7.92±1.62     | 3.89±0.63     |
| Low (D18)      | 162.55±42.79  | 9.17±0.02      | 234.72±78.03*    | 5.12±0.91    | 6.66±0.69     | 4.52±0.44     |
| High (D18)     | 332.33±105.96 | 10.40±0.60     | 267.32±56.92**   | 5.82±0.96    | 9.12±0.58     | 2.67±0.98     |
| Control (D18)  | < 0           | 9.83±0.52      | 140.23±25.68     | 4.34±0.83    | 8.98±1.35     | 3.46±0.55     |
| Low (D60)      | ND            | ND             | 131.39±39.45     | 3.99±0.24    | 13.12±2.82    | 2.77±0.21     |
| High (D60)     | ND            | ND             | ND               | ND           | ND            | ND            |
| Control (D60)  | ND            | ND             | 126.34±31.25     | 4.68±0.58    | 11.63±3.21    | 2.89±0.38     |
| Low (D120)     | ND            | ND             | 29.17±6.79       | 6.46±0.31    | 15.16±0.79    | 1.37±0.01     |
| High (D120)    | ND            | ND             | 13.30±7.75       | 5.63±0.14    | 16.23±0.70    | 1.63±0.26     |
| Low (D180)     | ND            | ND             | 83.12±25.66      | 10.41±0.12   | 31.55±2.51    | 2.25±0.01     |
| High (D180)    | ND            | ND             | 77.78±15.80      | 14.34±1.03   | 35.50±7.37    | 4.47±1.86     |
| Control (D180) | ND            | ND             | 50.34±3.97       | 11.71±3.34   | 37.51±1.26    | 2.99±0.78     |

**Table S8.** The visceral index of organs of offspring following the maternal exposure to high and low dose QDs. D60, D120 and D180 refer to collection of offspring organ on post-injection in day 60, 120 and day 180. These results show mean and standard deviation, n=4. \*P < 0.05 and \*\*P < 0.01 versus the control group.

|        |               | <b>BW (g)</b> | <b>Liver (mg/g)</b> | <b>Spleen (mg/g)</b> | <b>Kidney (mg/g)</b> | <b>Lung (mg/g)</b> | <b>Heart (mg/g)</b> | <b>Brain (mg/g)</b> | <b>Testis/Uterus (mg/g)</b> |
|--------|---------------|---------------|---------------------|----------------------|----------------------|--------------------|---------------------|---------------------|-----------------------------|
| Male   | Control (D60) | 295.86±27.89  | 44.05±1.14          | 2.21±0.32            | 8.30±0.24            | 4.69±0.48          | 4.11±0.49           | 4.84±0.21           | 9.74±0.94                   |
|        | Low (D60)     | 266.62±9.66*  | 51.58±1.08          | 2.82±0.09            | 7.95±0.20            | 5.95±0.64          | 5.01±0.62           | 5.64±0.27           | 9.21±0.36                   |
| Female | Control (120) | 275.85±18.22  | 37.39±2.30          | 2.24±0.09            | 7.14±0.24            | 9.36±0.04          | 4.62±0.68           | 6.17±0.29           | 2.81±0.64                   |
|        | Low (D120)    | 280.64±20.62  | 39.75±1.53          | 2.08±0.28            | 7.08±0.23            | 5.48±0.65**        | 3.97±0.35           | 4.95±0.86           | 1.92±0.25                   |
|        | High (D120)   | 265.22±29.58  | 42.80±2.21          | 2.18±0.20            | 7.16±0.31            | 5.47±0.14**        | 4.52±0.12           | 6.67±0.87           | 4.85±0.63**                 |
| Female | Control (180) | 308.15±28.74  | 31.07±2.65          | 1.83±0.33            | 5.80±0.38            | 9.26±2.96          | 4.12±0.46           | 5.55±0.88           | 2.90±1.11                   |
|        | Low (D180)    | 332.62±18.50  | 32.70±1.37          | 1.86±0.33            | 5.60±0.30            | 7.68±1.41          | 3.37±0.30           | 4.73±0.26           | 1.84±0.38                   |
|        | High (D180)   | 303.01±31.55  | 29.01±2.20          | 2.59±0.69            | 5.88±0.80            | 10.93±2.30         | 4.00±0.25           | 5.77±0.32           | 2.83±0.93                   |

**Table S9.** Serum biochemical indicators of offspring following maternal exposure to 5 nmol (high) or 1 nmol (low) QDs and vehicle control. Abbreviations: total bilirubin, TBIL; total protein, TP; albumin, ALB; globulin, GLB; the ratio of albumin to globulin, A/G; alkaline phosphatase, ALP; creatinine, CREA and urea, UA, n = 3. \*P < 0.05 and \*\*P < 0.01 versus the control group.

|      |         | TBIL (μmol/L) | TP (g/L)   | ALB (g/L)  | GLB (g/L)  | A/G       | ALP (U/L)       | CREA (μmol/L) | UA (μmol/L)  |
|------|---------|---------------|------------|------------|------------|-----------|-----------------|---------------|--------------|
| D18  | Control | 0.77±0.04     | 51.96±1.15 | 24.27±0.20 | 27.7±0.95  | 0.87±0.25 | 800±425.74      | 12.3±0.21     | 230±16.46    |
|      | Low     | 1.08±0.25     | 54.16±2.86 | 24.74±1.30 | 29.42±1.62 | 0.84±0.02 | 655.2±38.11     | 11.92±4.58    | 170±33.29    |
|      | High    | 1.30±0.07*    | 53.93±1.43 | 23.96±0.29 | 29.96±1.35 | 0.8±0.04  | 2102±1058.18**  | 10.16±2.44    | 221.34±25.42 |
| D60  | Control | 0.45±0.04     | 67.8±4.65  | 29.7±1.14  | 40.1±1.87  | 0.74±0.01 | 508±22.86       | 21.2±0.90     | 232±24.50    |
|      | Low     | 0.20±0        | 58.05±3.31 | 25.6±1.39  | 32.45±1.92 | 0.79±0.01 | 414±6.53        | 17.3±0.25     | 272.5±42.87  |
|      | High    | 1.33±0.77**   | 79.45±4.63 | 29.77±4.59 | 49.7±2.18  | 0.60±0.10 | 227.67±133.56** | 35.46±5.01*   | 110±3.94**   |
| D120 | Control | 0.63±0.15     | 81.43±2.16 | 25.43±2.44 | 56±2.96    | 0.46±0.07 | 177±26.69       | 34.27±3.92    | 190±7.97     |
|      | Low     | 1.1±0.19*     | 73.53±2.40 | 27.7±0.92  | 45.83±2.53 | 0.60±0.04 | 169±60.02       | 29.23±4.15    | 287.33±55.41 |
|      | High    | 0.58±0.12     | 83.25±2.25 | 33±0.75    | 50.25±2.31 | 0.66±0.04 | 364±98.06**     | 32.73±2.13    | 141.25±53.63 |
| D150 | Control | 1.25±0.34     | 74.3±1.86  | 25.83±0.66 | 48.35±2.12 | 0.54±0.03 | 125.25±23.15    | 36.3±3.70     | 94.5±21.91   |
|      | Low     | 1.15±0.26     | 74.35±3.01 | 24.83±3.95 | 49.53±6.21 | 0.52±0.13 | 119±39.81       | 33.63±1.44    | 118.75±12.45 |
|      | High    | 1.98±0.53     | 69.65±1.72 | 25.55±2.75 | 44.1±3.86  | 0.59±0.11 | 110.25±31.30    | 30.83±6.60    | 110±5.18     |
| D180 | Control | 0.83±0.12     | 80.48±1.68 | 26.93±2.11 | 53.58±1.67 | 0.51±0.05 | 95.25±3.06      | 38.65±3.18    | 127.25±18.29 |
|      | Low     | 0.77±0.18     | 81.73±3.02 | 28.97±1.24 | 52.77±2.97 | 0.55±0.04 | 104.33±15.90    | 34.53±4.29    | 158.33±39.07 |
|      | High    | 0.60±0.17     | 81.38±2.27 | 23.63±4.06 | 57.75±4.75 | 0.42±0.10 | 120.75±34.17    | 41.83±3.38    | 145±35.13    |
